# Supplementary material for: Virulence of oomycete pathogens from Phragmites australis-invaded and noninvaded soils to seedlings of wetland plant species
Source: PubMed Central journal article supplement (PMC4461415; doi:10.1002/ece3.1468), 2015-05-05
Supplement: ece30005-2127-sd1.pdf [file ece30005-2127-sd1.pdf]

1 **Supporting Table 1:** Field sites at the Montezuma National Wildlife Refuge, Savannah NY for  
 2 soil collection.

3

| Site | Location    | Latitude         | Longitude        | Plant species present in non-invaded area                                                                                                                                                                                                                                                    |
|------|-------------|------------------|------------------|----------------------------------------------------------------------------------------------------------------------------------------------------------------------------------------------------------------------------------------------------------------------------------------------|
| CC   | Carncross   | 43°04'56.624'' N | 76°42'38.241'' W | <i>P. a. americanus</i> ,<br><i>Ph. arundinacea</i> ,<br><i>Eupatorium maculatum</i> ,<br><i>Lythrum salicaria</i> ,<br><i>Spartina pectinata</i> ,<br><i>Typha sp.</i> ,<br><i>Solanum dulcamera</i> ,<br><i>Carex lacustris</i> ,<br><i>Apocynum cannabinum</i> ,<br><i>Vitis riparius</i> |
| EP   | Eagle Point | 43°10'16.123'' N | 76°47'34.704'' W |                                                                                                                                                                                                                                                                                              |
| RR   | Railroad    | 43° 3'22.98" N   | 76°42'37.46" W   |                                                                                                                                                                                                                                                                                              |
| RT   | Rt 31       | 43° 0'58.87" N   | 76°42'0.19" W    |                                                                                                                                                                                                                                                                                              |

4

5

6 **Supporting Table 2:** Reported plant host ranges of *Pythium* species isolated from *P. australis*-  
 7 invaded and non-invaded soils.  
 8

| <i>Pythium</i> species     | Host range (plant families)                                                           | References                                                                                                                             |
|----------------------------|---------------------------------------------------------------------------------------|----------------------------------------------------------------------------------------------------------------------------------------|
| <i>Py. adhaerens</i>       | Chenopodiaceae, Cucurbitaceae, Fabaceae, Poaceae                                      | (Sparrow 1932)                                                                                                                         |
| <i>Py. angustatum</i>      | Poaceae                                                                               | (Sparrow 1932)                                                                                                                         |
| <i>Py. aquatile</i>        | Brassicaceae, Solanaceae                                                              | (Robertson 1973; Uzuhashi <i>et al.</i> 2008)                                                                                          |
| <i>Py. arrhenomanes</i>    | Poaceae                                                                               | (Vanterpool 1942; Sprague 1950)                                                                                                        |
| <i>Py. attrantheridium</i> | Fabaceae, Poaceae, Rosaceae, Umbelliferae                                             | (Allain-Boule <i>et al.</i> 2004; Packer & Clay 2004; Broders <i>et al.</i> 2007; Reinhart <i>et al.</i> 2010b)                        |
| <i>Py. carolinianum</i>    | Malvaceae, Proteaceae, Haloragaceae, Rosaceae, Pinaceae, Cucurbitaceae, Amaranthaceae | (Bazan De Segura 1970; Watanabe, Hashimoto & Sato 1977; Bernhardt & Duniway 1984; Watanabe 1988; Abdelzaher & Elnaghy 1998)            |
| <i>Py. chondricola</i>     | None known                                                                            |                                                                                                                                        |
| <i>Py. citrinum</i>        | None known                                                                            | (Paul 2004)                                                                                                                            |
| <i>Py. conidiophorum</i>   | Fabaceae                                                                              | (Nzungize <i>et al.</i> 2011)                                                                                                          |
| <i>Py. contiguanum</i>     | None known                                                                            |                                                                                                                                        |
| <i>Py. deliense</i>        | Poaceae, Fabaceae, Solanaceae, Amaranthaceae                                          | (Raftoyannis & Dick 2006)                                                                                                              |
| <i>Py. dissimile</i>       | Poaceae, Fabaceae, Solanaceae, Amaranthaceae                                          | (Vestberg 1990; Raftoyannis & Dick 2006)                                                                                               |
| <i>Py. dissotocum</i>      | Very broad                                                                            | (Spencer 2004a)                                                                                                                        |
| <i>Py. echinulatum</i>     | Poaceae, Rosaceae, Fabaceae                                                           | (Watanabe, Hashimoto & Sato 1977; Braun 1995; Higginbotham, Paulitz & Kidwell 2004; Broders <i>et al.</i> 2007)                        |
| <i>Py. heterothallicum</i> | Caprifoliaceae, Chenopodiaceae, Fabaceae, Geraniaceae, Poaceae, Rosaceae              | (Spencer 2004b)                                                                                                                        |
| <i>Py. hypogynum</i>       | Poaceae                                                                               | (Middleton 1941)                                                                                                                       |
| <i>Py. inflatum</i>        | Poaceae, Fabaceae, Solanaceae                                                         | (Robertson 1973; Broders <i>et al.</i> 2007; Van Buyten & Hofte 2013)                                                                  |
| <i>Py. intermedium</i>     | Rosaceae, Umbelliferae, Brassicaceae, Cucurbitaceae, Onaceae                          | (Long & Cooke 1969; Stanghellini <i>et al.</i> 1988; Mazzola <i>et al.</i> 2002; Hermansen <i>et al.</i> 2007; Suffert & Guibert 2007) |
| <i>Py. irregulare</i>      | Very broad                                                                            | (Spencer 2004c; Farr & Rossman 2014)                                                                                                   |
| <i>Py. kashmirensis</i>    | None known                                                                            |                                                                                                                                        |
| <i>Py. litorale</i>        | Cucurbitaceae, Rosaceae                                                               | (Tewoldemedhin <i>et al.</i> 2011; Parkunan & Ji 2013)                                                                                 |
| <i>Py. marsipium</i>       | None known                                                                            |                                                                                                                                        |
| <i>Py. monospermum</i>     | Poaceae, Solanaceae                                                                   | (Sprague 1950; Robertson 1973)                                                                                                         |
| <i>Py. oopapillum</i>      | Very broad                                                                            | (Bala <i>et al.</i> 2010)                                                                                                              |
| <i>Py. parvum</i>          | None known                                                                            |                                                                                                                                        |
| <i>Py. perplexum</i>       | Myrtaceae                                                                             | (Mwanza & Kellas 1987)                                                                                                                 |
| <i>Py. phragmitis</i>      | Poaceae                                                                               | (Nechwatal, Wielgoss & Mendgen 2005)                                                                                                   |
| <i>Py. pleroticum</i>      | Zingiberaceae                                                                         | (Dohroo, Bhardwaj & Shyam                                                                                                              |

|                         |                                |                                                                                                              |
|-------------------------|--------------------------------|--------------------------------------------------------------------------------------------------------------|
| <i>Py. pyrilobum</i>    | Poaceae, Myrtaceae, Annonaceae | 1987)<br>(Ward & Shipton 1984; Cother & Gilbert 1993; Abad, Shew & Lucas 1994; Linde, Kemp & Wingfield 1994) |
| <i>Py. radiosum</i>     | None known                     |                                                                                                              |
| <i>Py. rhizo-oryzae</i> | None known                     | (Bala, Gautam & Paul 2006)                                                                                   |
| <i>Py. segnitium</i>    | None known                     |                                                                                                              |
| <i>Py. sylvaticum</i>   | Very broad                     | (Spencer 2004d)                                                                                              |
| <i>Py. torulosum</i>    | Very broad                     |                                                                                                              |
| <i>Py. volutum</i>      | Poaceae                        | (Sprague 1950; Kerns & Tredway 2008)                                                                         |

---

## 9 References

- 10 Abad, Z.G., Shew, H.D. & Lucas, L.T. (1994) Characterization and pathogenicity of *Pythium* species isolated from turfgrass with  
11 symptoms of root and crown rot in North Carolina. *Phytopathology*, **84**, 913-921.
- 12 Abdelzaher, H.M.A. & Elnaghy, M.A. (1998) Identification of *Pythium carolinianum* causing root rot of cotton in Egypt and its  
13 possible biological control by *Pseudomonas fluorescens*. *Mycopathologia.85 (1-2)*. 1984. \* *En \* 121-128.*, **142**, 143-  
14 151.
- 15 Allain-Boule, N., Levesque, C.A., Martinez, C., Belanger, R.R. & Tweddell, R.J. (2004) Identification of *Pythium* species  
16 associated with cavity-spot lesions on carrots in eastern Quebec. *Canadian Journal of Plant Pathology*, **26**, 365-370.
- 17 Bala, K., Gautam, N. & Paul, B. (2006) *Pythium rhizo-oryzae* sp nov isolated from paddy fields: Taxonomy, ITS region of  
18 rDNA, and comparison with related species. *Current Microbiology*, **52**, 102-107.
- 19 Bala, K., Robideau, G.P., Desaulniers, N., de Cock, A.W.A.M. & Levesque, C.A. (2010) Taxonomy, DNA barcoding and  
20 phylogeny of three new species of *Pythium* from Canada. *Persoonia*, **25**, 22-31.
- 21 Bazan De Segura, C. (1970) Nursery root rot of *Macadamia integrifolia* d *Pythium carolinianum*. *Turrialba*, **20**, 513-514.
- 22 Bernhardt, E.A. & Duniway, J.M. (1984) Root and stem rot of parrotfeather *Myriophyllum brasiliense* caused by *Pythium*  
23 *carolinianum*. *Plant Disease*, **68**, 999-1003.
- 24 Braun, P.G. (1995) Effects of *Cylindrocarpon* and *Pythium* species on apple seedlings and potential role in apple replant disease.  
25 *Canadian Journal of Plant Pathology*, **17**, 336-341.
- 26 Broders, K.D., Lipps, P.E., Paul, P.A. & Dorrance, A.E. (2007) Characterization of *Pythium* spp. associated with corn and  
27 soybean seed and seedling disease in Ohio. *Plant Disease*, **91**, 727-735.
- 28 Bütöf, A. & Bruelheide, H. (2011) Effects of an unspecialized soil pathogen on congeneric plant species with different  
29 geographic distributions. *Preslia*, **83**, 205-217.
- 30 Cother, E.J. & Gilbert, R.L. (1993) Comparative pathogenicity of *Pythium* species associated with poor seedling establishment of  
31 rice in Southern Australia. *Plant Pathology*, **42**, 151-157.
- 32 Dohroo, N.P., Bhardwaj, S.S. & Shyam, K.R. (1987) Amylase and invertase activity as influenced by *Pythium pleroticum*  
33 causing rhizome rot of ginger. *Plant Disease Research*, **2**, 106-107.
- 34 Farr, D.F. & Rossman, A.Y. (2014) Fungal Databases, Systematic Mycology and Microbiology Laboratory, ARS, USDA.  
35 Retrieved from <http://nt.ars-grin.gov/fungaldatabases/>. Beltsville, MD.
- 36 Hermansen, A., Herrero, M.L., Gauslaa, E., Razzaghian, J., Naerstad, R. & Klemsdal, S.S. (2007) *Pythium* species associated  
37 with cavity spot on carrots in Norway. *Annals of Applied Biology*, **150**, 115-121.
- 38 Higginbotham, R.W., Paulitz, T.C. & Kidwell, K.K. (2004) Virulence of *Pythium* species isolated from wheat fields in eastern  
39 Washington. *Plant Disease*, **88**, 1021-1026.
- 40 Kerns, J.P. & Tredway, L.P. (2008) Pathogenicity of *Pythium* species associated with *Pythium* root dysfunction of creeping  
41 bentgrass and their impact on root growth and survival. *Plant Disease*, **92**, 862-869.
- 42 Linde, C., Kemp, G.H.J. & Wingfield, M.J. (1994) *Pythium* and *Phytophthora* species associated with Eucalypts and pines in  
43 South Africa. *European Journal of Forest Pathology*, **24**, 345-356.
- 44 Long, P.G. & Cooke, R.C. (1969) Fungal factors and density-induced mortality in plant species. *Transactions of the British*  
45 *Mycological Society*, **52**, 49-&.
- 46 Mazzola, M., Andrews, P.K., Reganold, J.P. & Levesque, C.A. (2002) Frequency, virulence, and metalaxyl sensitivity of  
47 *Pythium* spp. isolated from apple roots under conventional and organic production systems. *Plant Disease*, **86**, 669-675.
- 48 Middleton, J.T. (1941) Root rot of barley caused by *Pythium hypogynum* n.sp. *Phytopathology*, **31**, 863.
- 49 Mwanza, E.J.M. & Kellas, J.D. (1987) Identification of the fungi associated with damping-off in the regeneration of *Eucalyptus*  
50 *obliqua* and *Eucalyptus radiata* in a central Victorian forest. *European Journal of Forest Pathology*, **17**, 237-245.

- 51 Nechwatal, J., Wielgoss, A. & Mendgen, K. (2005) *Pythium phragmitis* sp nov., a new species close to *P. arrhenomanes* as a  
52 pathogen of common reed (*Phragmites australis*). *Mycological Research*, **109**, 1337-1346.
- 53 Nzungize, J., Gepts, P., Buruchara, R., Buah, S., Ragama, P., Busogoro, J.P. & Baudoin, J.P. (2011) Pathogenic and molecular  
54 characterization of *Pythium* species inducing root rot symptoms of common bean in Rwanda. *African Journal of*  
55 *Microbiology Research*, **5**, 1169-1181.
- 56 Packer, A. & Clay, K. (2004) Development of negative feedback during successive growth cycles of black cherry. *Proceedings of*  
57 *the Royal Society of London Series B-Biological Sciences*, **271**, 317-324.
- 58 Parkunan, V. & Ji, P.S. (2013) Isolation of *Pythium litorale* from irrigation ponds used for vegetable production and its  
59 pathogenicity on squash. *Canadian Journal of Plant Pathology*, **35**, 415-423.
- 60 Paul, B. (2004) A new species of *Pythium* isolated from burgundian vineyards and its antagonism towards *Botrytis cinerea*, the  
61 causative agent of the grey mould disease. *FEMS Microbiology Letters*, **234**, 269-274.
- 62 Raftoyannis, Y. & Dick, M.W. (2006) Zoospore encystment and pathogenicity of *Phytophthora* and *Pythium* species on plant  
63 roots. *Microbiological Research*, **161**, 1-8.
- 64 Reinhart, K.O. & Clay, K. (2009) Spatial variation in soil-borne disease dynamics of a temperate tree, *Prunus serotina*. *Ecology*,  
65 **90**, 2984-2993.
- 66 Reinhart, K.O., Royo, A.A., Kageyama, S.A. & Clay, K. (2010a) Canopy gaps decrease microbial densities and disease risk for a  
67 shade-intolerant tree species. *Acta Oecologica*, **36**, 530-536.
- 68 Reinhart, K.O., Royo, A.A., Van der Putten, W.H. & Clay, K. (2005) Soil feedback and pathogen activity in *Prunus serotina*  
69 throughout its native range. *Journal of Ecology*, **93**, 890-898.
- 70 Reinhart, K.O., Tytgat, T., Van der Putten, W.H. & Clay, K. (2010b) Virulence of soil-borne pathogens and invasion by *Prunus*  
71 *serotina*. *New Phytologist*, **186**, 484-495.
- 72 Reinhart, K.O., Van der Putten, W.H., Tytgat, T. & Clay, K. (2011) Variation in specificity of soil-borne pathogens from a  
73 plant's native range versus its nonnative range. *International Journal of Ecology*, **Article ID 737298**, 6 pages.
- 74 Robertson, G.I. (1973) Pathogenicity of *Pythium* spp. to seeds and seedling roots. *New Zealand Journal of Agricultural Research*,  
75 **16**, 367-372.
- 76 Sparrow, F.K. (1932) Observations on the parasitic ability of certain species of *Pythium*. *Phytopathology*, **22**, 385-390.
- 77 Spencer, M.A. (2004a) *Pythium dissotocum*. Descriptions of Fungi and Bacteria. *IMI Descriptions of Fungi and Bacteria*, **Sheet**  
78 **1613**, 2 p.
- 79 Spencer, M.A. (2004b) *Pythium heterothallicum*. Descriptions of Fungi and Bacteria. *IMI Descriptions of Fungi and Bacteria*,  
80 **Sheet 1614**, 2 p.
- 81 Spencer, M.A. (2004c) *Pythium irregulare*. *IMI Descriptions of Fungi and Bacteria*, **162**, 1616-1616.
- 82 Spencer, M.A. (2004d) *Pythium sylvaticum*. Descriptions of Fungi and Bacteria. *IMI Descriptions of Fungi and Bacteria*, **Sheet**  
83 **1619**, 2 p.
- 84 Sprague, R. (1950) *Diseases of cereals and grasses in North America*. Ronald Press Co., New York.
- 85 Stanghellini, M.E., White, J.G., Tomlinson, J.A. & Clay, C. (1988) Root rot of hydroponically grown cucumbers caused by  
86 zoospore-producing isolates of *Pythium intermedium*. *Plant Disease*, **72**, 358-359.
- 87 Suffert, F. & Guibert, M. (2007) The ecology of a *Pythium* community in relation to the epidemiology of carrot cavity spot.  
88 *Applied Soil Ecology*, **35**, 488-501.
- 89 Tewoldemedhin, Y.T., Mazzola, M., Botha, W.J., Spies, C.F.J. & McLeod, A. (2011) Characterization of fungi (*Fusarium* and  
90 *Rhizoctonia*) and oomycetes (*Phytophthora* and *Pythium*) associated with apple orchards in South Africa. *European*  
91 *Journal of Plant Pathology*, **130**, 215-229.
- 92 Uzuhashi, S., Tojo, M., Kobayashi, S., Tokura, K. & Kakishima, M. (2008) First records of *Pythium aquatile* and *P.*  
93 *macrosporum* isolated from soils in Japan. *Mycoscience*, **49**, 276-279.
- 94 Van Buyten, E. & Hofte, M. (2013) *Pythium* species from rice roots differ in virulence, host colonization and nutritional profile.  
95 *Bmc Plant Biology*, **13**.
- 96 Vanterpool, T.C. (1942) *Pythium arrhenomanes* on cereals and grasses in the Northern Great Plains. *Phytopathology*, **32**, 327-  
97 328.
- 98 Vestberg, M. (1990) Occurrence and pathogenicity of *Pythium* spp. in seedling roots of winter rye. *Journal of Agricultural*  
99 *Science in Finland*, **62**, 275-284.
- 100 Ward, D.E. & Shipton, W.A. (1984) Root rot of papaw caused by *Pythium pyrilobum*. *Australasian Plant Pathology*, **13**, 25-27.
- 101 Watanabe, T. (1988) Pathogenic fungi associated with forest seeds including *Pythium* species from cherry seeds. *Transactions of*  
102 *the Mycological Society of Japan*, **29**, 197-203.
- 103 Watanabe, T., Hashimoto, K. & Sato, M. (1977) *Pythium* species associated strawberry roots in Japan, and their role in  
104 strawberry stunt disease. *Phytopathology*, **67**, 1324-1332.

105 **Supporting Figure 1:** Twenty-five most frequently isolated oomycete species recovered from *P.*  
 106 *australis*-invaded and non-invaded soils at different sampling dates. Isolation frequency reflects  
 107 the number of isolates of a given species obtained at a particular sampling time relative to the  
 108 total number of isolates recovered at that sampling time.

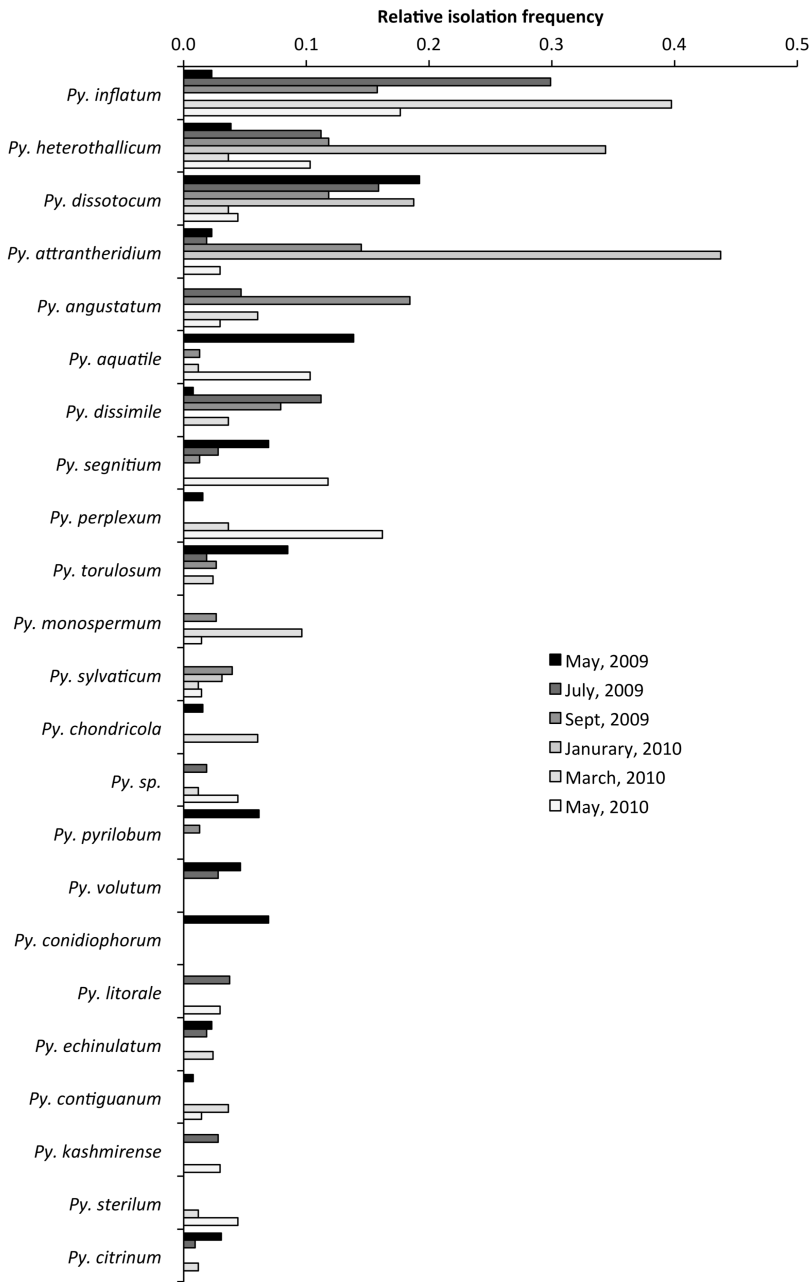

109

110 **Supporting Figure 2:** Distribution of oomycete species across sampling sites.

111 Isolation frequency reflects the number of isolates of a given species obtained at a

112 particular site relative to the total number of isolates recovered from that site.

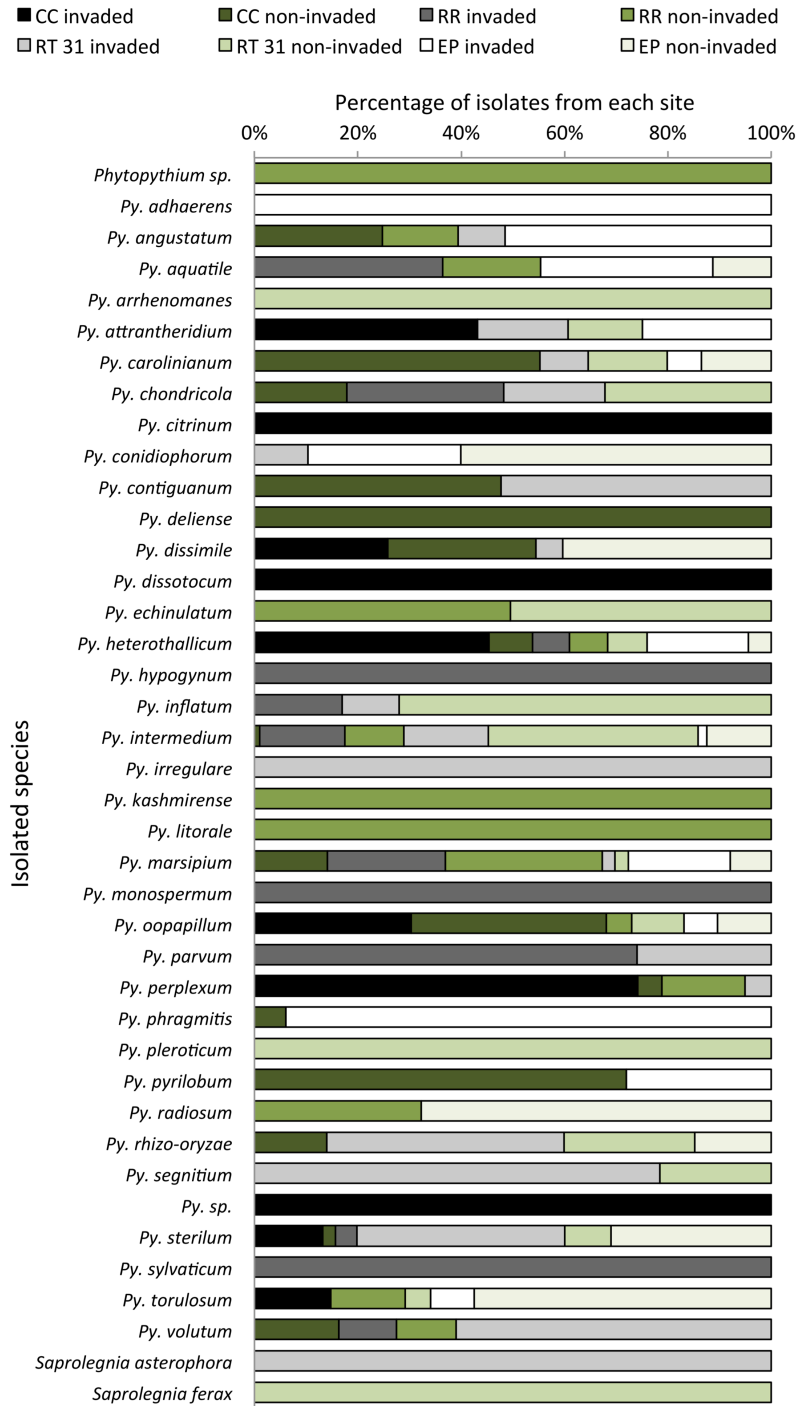

113

114 **Supporting Figure 3:** Overall seedling survival following inoculation by a single isolate  
 115 of a given *Pythium* species. Error bars indicate standard error of seedling survival.

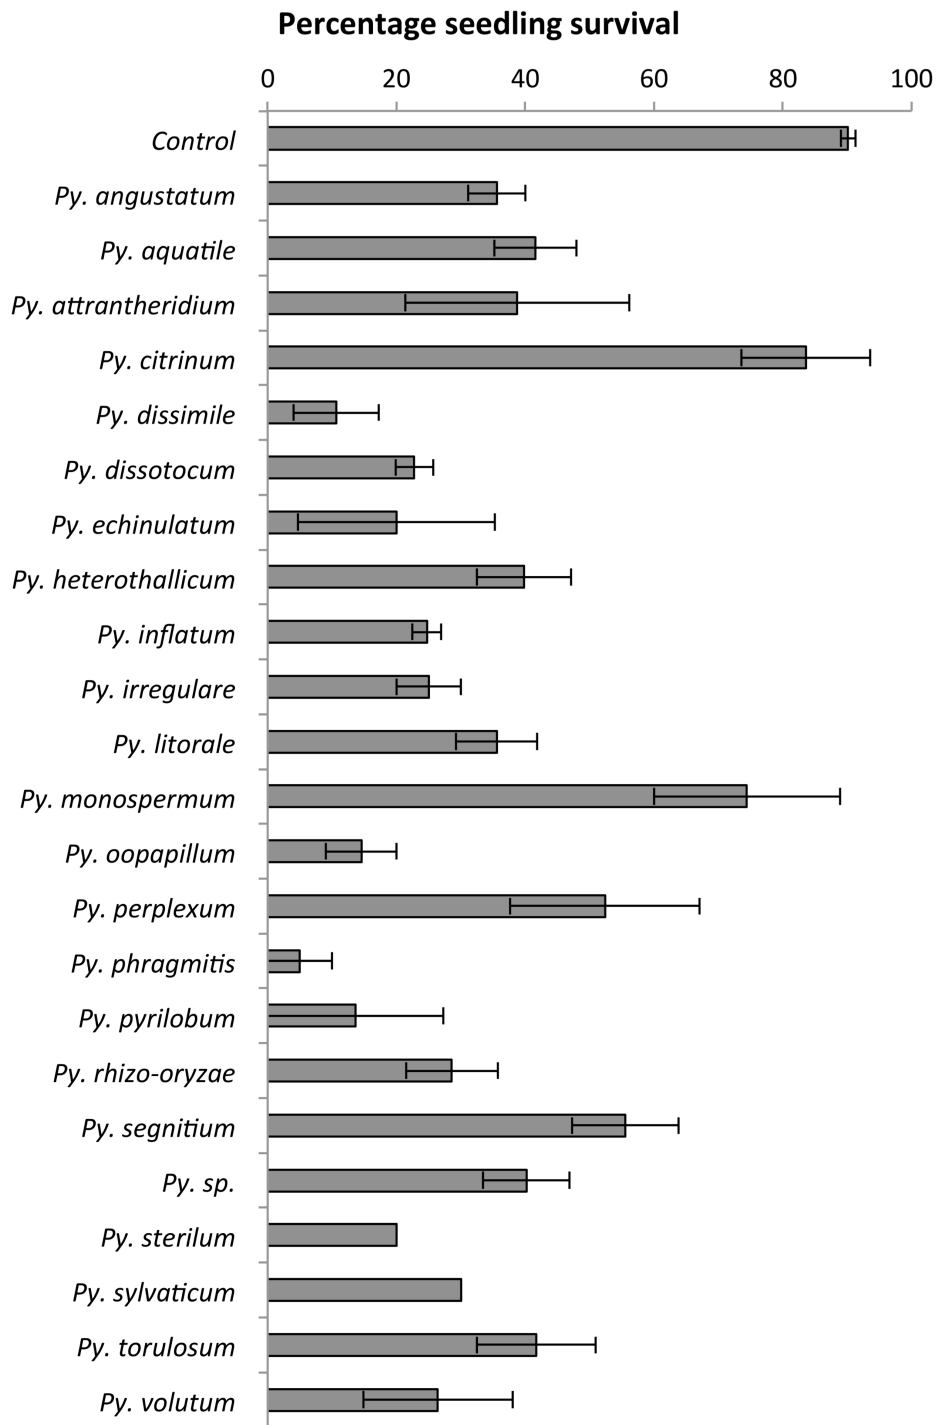

116

117 **Supporting Figure 4:** Percent seedling survival of *E. glandulosum* (black bars), *P.*  
 118 *australis* (dark grey bars), *P. a. americanus* (medium grey bars), *M. glomerata* (light grey  
 119 bars) and *L. salicaria* (white bars) following inoculation with isolates recovered from *P.*  
 120 *australis*-invaded and non-invaded soils. *Py. dissimile* (A), *Py. attrantheridium* (B), *Py.*  
 121 *angustatum* (C), *Py. heterothallicum* (D), *Py. dissotocum* (E), *Py. inflatum* (F). Error bars  
 122 indicate standard errors from the mean of seedling survival.

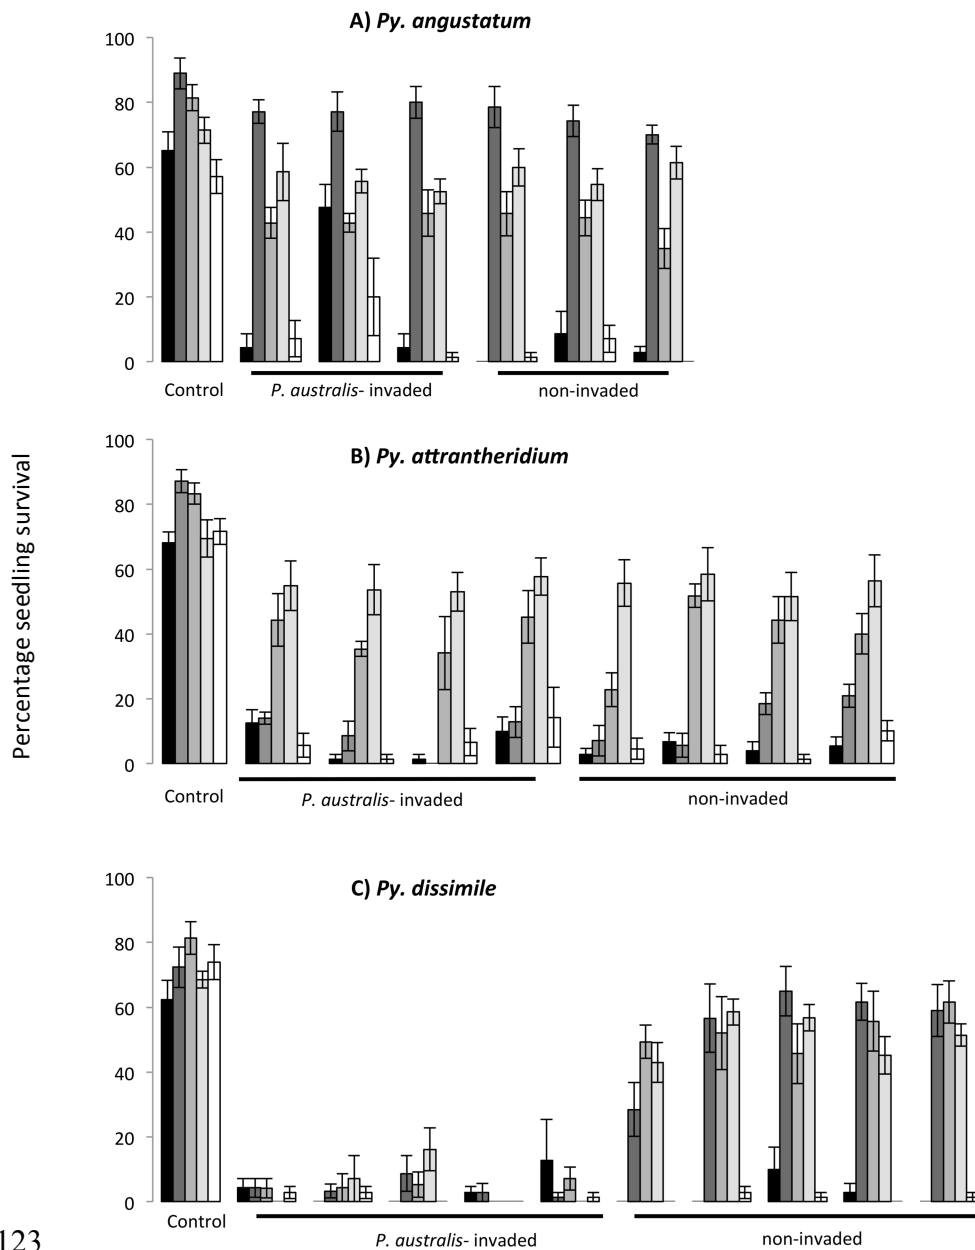

123



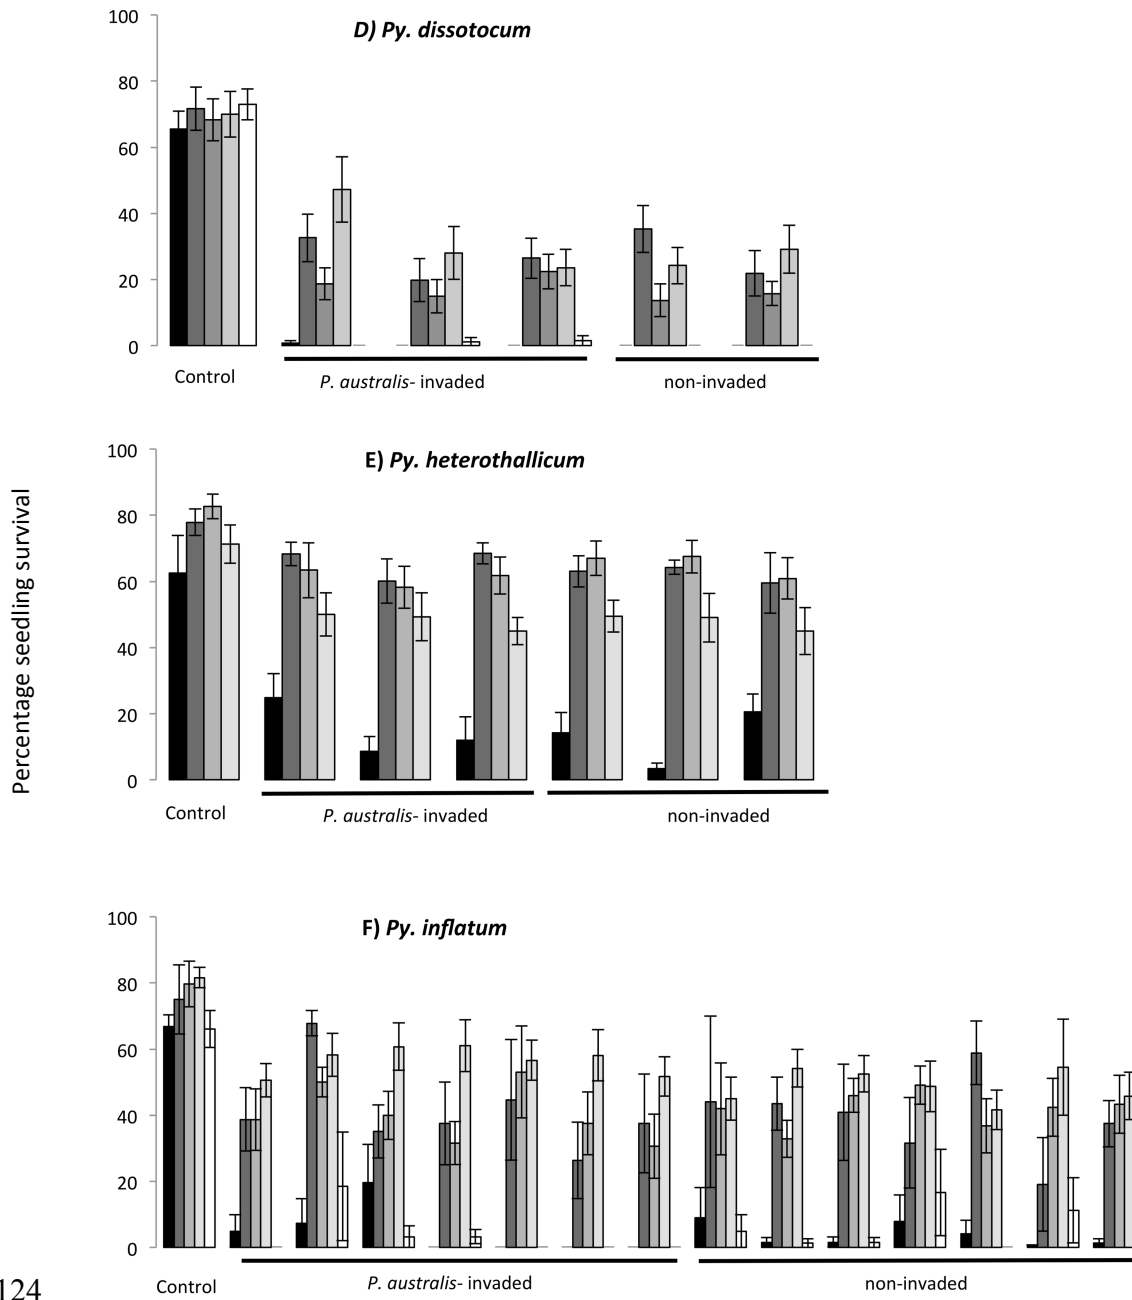

124  
125
